# Supplementary material for: Laforin targets malin to glycogen in Lafora progressive myoclonus epilepsy
Source: Oxford University Press journal article supplement (doi:10.1242/dmm.049802), 2022-12-13
Supplement: dmm049802supp.pdf [file dmm049802supp.pdf]

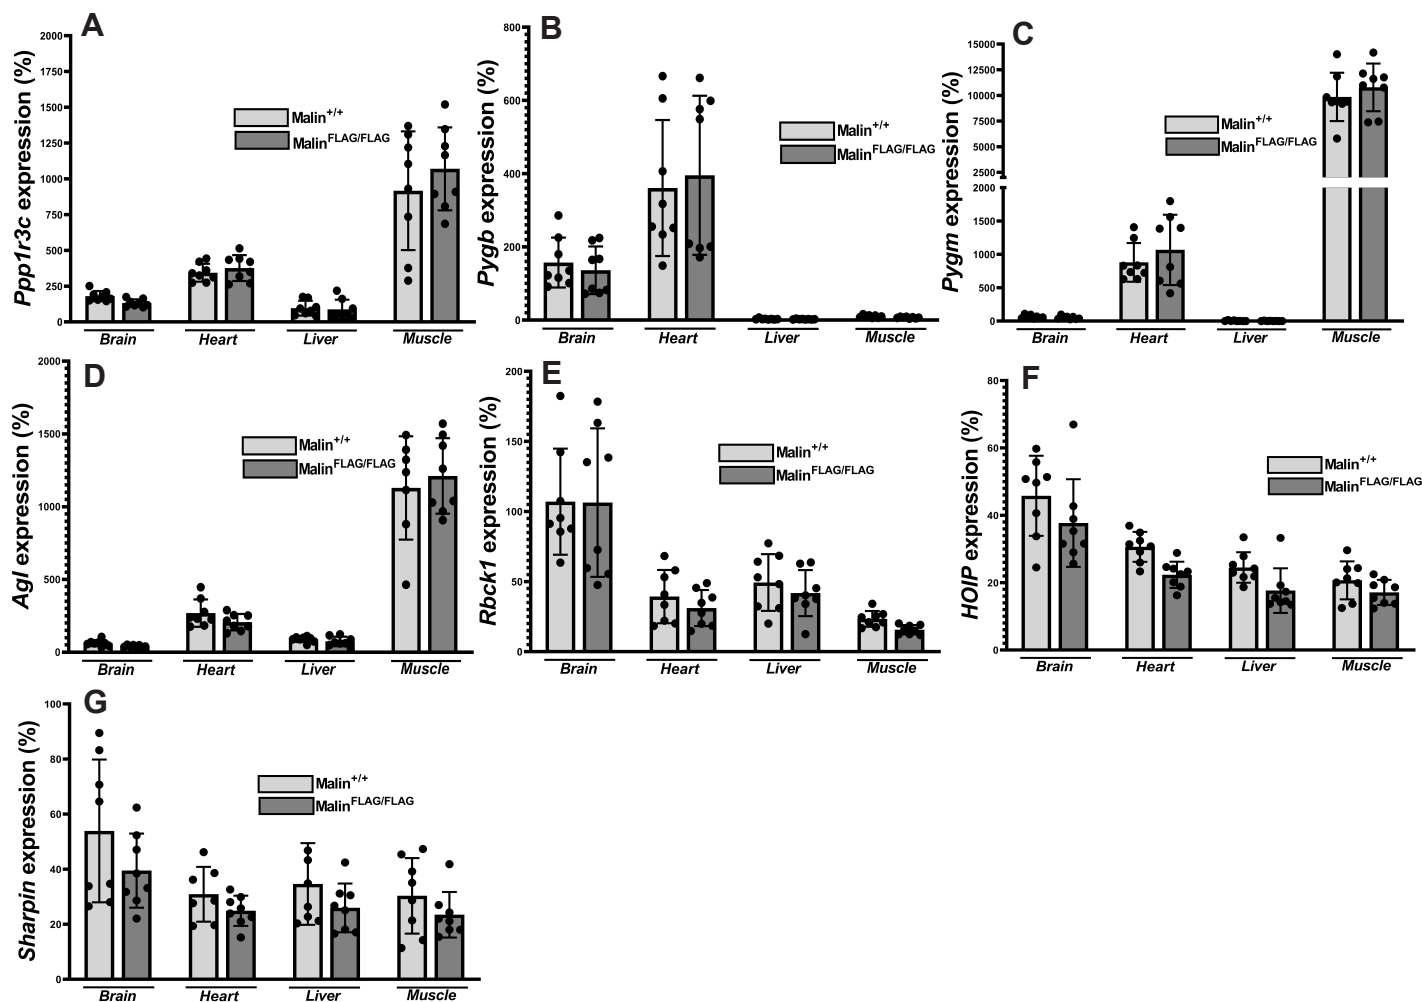

**Fig. S1. Quantitative PCR reveals no alterations of expression of various glycogen metabolism related genes in FLAG malin mice.** Total RNA from the indicated tissues (3 month-old, males and females are equally distributed with  $n=8$ ) were extracted and analyzed for expression quantification of the expression of indicated genes. Panels A-D show classical genes involved in glycogen metabolism, whereas panels E-G show genes of components of the linear ubiquitin chain assembly complex (LUBAC), including RBCK1, more recently implicated in glycogen metabolism. Data are represented as means  $\pm$  SD.

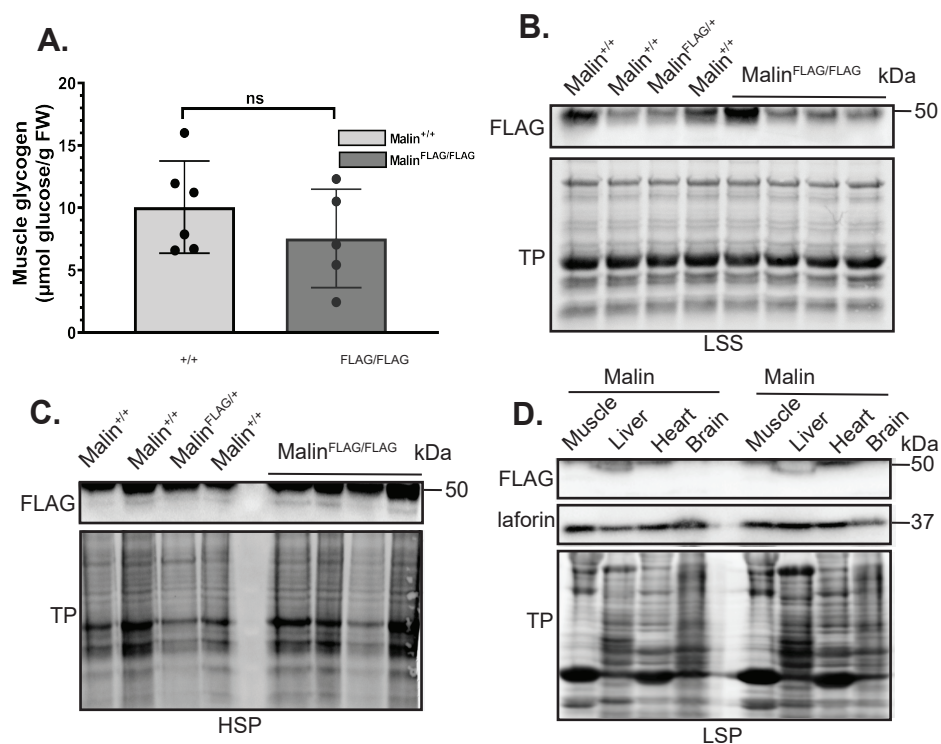

**Fig. S2. Malin association with brain HSP and tissue LSP fractions.** (A) Glycogen measurement from 7 month-old homozygous FLAG-malin mice ( $\text{Malin}^{\text{FLAG}/\text{FLAG}}$ ) and their WT littermates ( $\text{Malin}^{+/+}$ ) from muscle. Males and females are equally distributed in each group with  $n=5-6$ . Data are shown as means  $\pm$  SD. Significance levels are: \*,  $P < 0.05$ ; \*\*,  $P < 0.01$ ; \*\*\*,  $P < 0.001$ ; \*\*\*\*,  $P < 0.0001$ . FW, Fresh Weight of the tissues. (B) Immunoblot analysis using anti-FLAG with LSS fractions from muscle tissues of indicated genotypes of male mice shows no FLAG-malin band in  $\text{Malin}^{\text{FLAG}/\text{FLAG}}$ ,  $\text{Malin}^{\text{FLAG}/+}$  and  $\text{Malin}^{+/+}$  mice. (C) Immunoblot analysis using anti-FLAG with HSP fractions from brain tissues of indicated genotypes of male mice ( $n=4$ ) shows no FLAG-malin band in both  $\text{Malin}^{\text{FLAG}/\text{FLAG}}$  and  $\text{Malin}^{+/+}$  mice. (D) Immunoblot analysis using anti-FLAG with LSP fractions from indicated tissues of male  $\text{Malin}^{\text{FLAG}/\text{FLAG}}$  and  $\text{Malin}^{+/+}$  mice shows no FLAG-malin band (upper blot). The same blot was stripped and probed for laforin using an anti-laforin antibody, which showed the protein band (middle blot). In B-D, the lower blot is for total protein (TP).

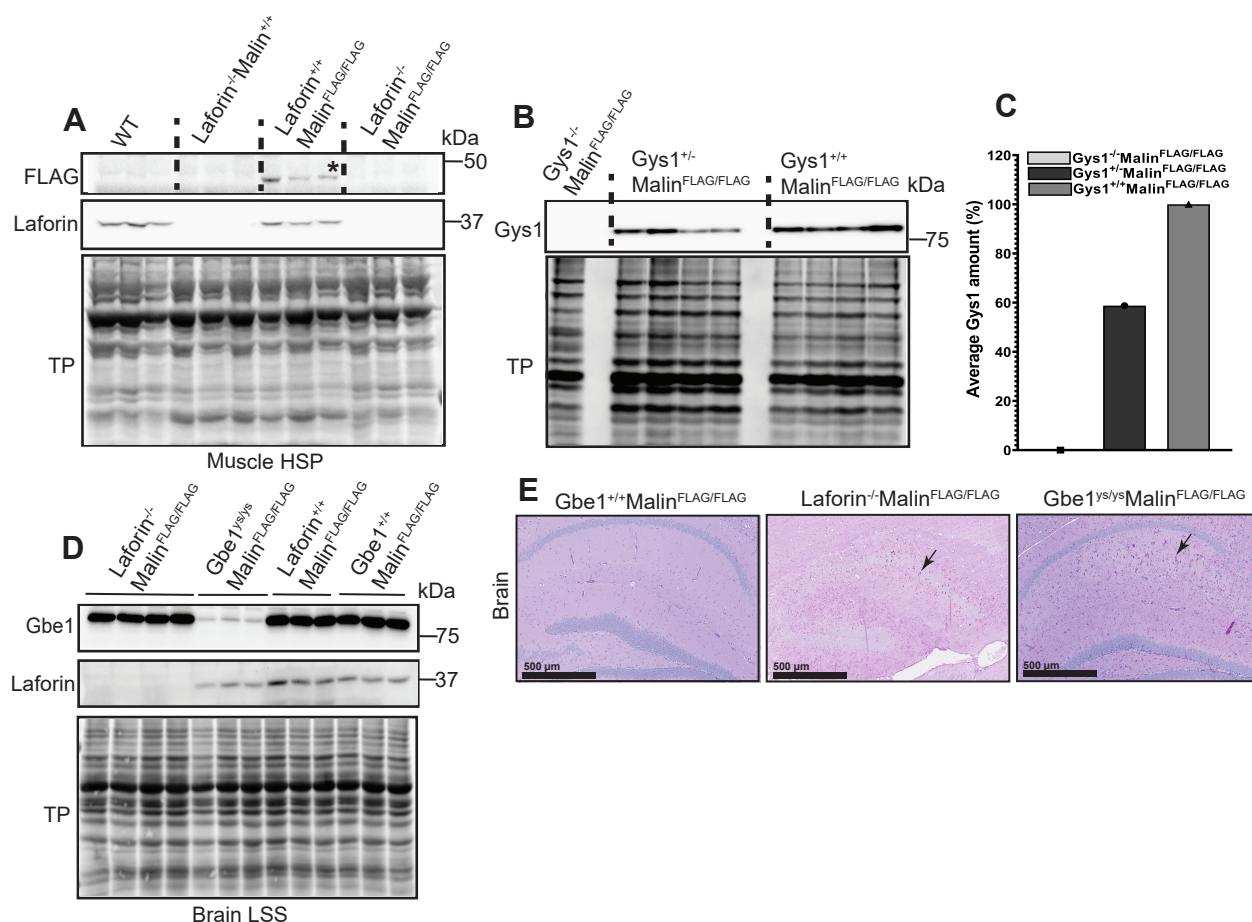

**Fig. S3. Laforin mediated glycogen association of malin validated using several mouse models.** (A) Supplementary to figure 4.A, immunoblot analysis with HSP fractions from muscle tissues of indicated genotypes of female mice shows FLAG-malin bands only in Laforin<sup>+/+</sup>Malin<sup>FLAG/FLAG</sup> mice but not in Laforin<sup>-/-</sup>Malin<sup>FLAG/FLAG</sup>, Laforin<sup>-/-</sup>Malin<sup>+/+</sup> or Laforin<sup>+/+</sup>Malin<sup>+/+</sup> (WT) mice. (B) Immunoblot analysis with LSS fractions from muscle tissues of the indicated genotypes of male mice shows absence or reduced Gys1 band intensity in Gys1<sup>-/-</sup>Malin<sup>FLAG/FLAG</sup> and Gys1<sup>+/-</sup>Malin<sup>FLAG/FLAG</sup> mice respectively compared with Gys1<sup>+/+</sup>Malin<sup>FLAG/FLAG</sup> mice. (C) Quantification of Gys1 protein band from (B). Average protein amount is calculated from n=4 with Gys1<sup>+/+</sup>Malin<sup>FLAG/FLAG</sup> and Gys1<sup>+/-</sup>Malin<sup>FLAG/FLAG</sup> genotypes. For Gys1<sup>-/-</sup>Malin<sup>FLAG/FLAG</sup>, only one mouse was used due to difficulties in obtaining such genotype (Pederson et al., 2004). As expected, partial

knockout of *Gys1* gene in FLAG-malin mouse ( $Gys1^{+/-}Malin^{FLAG/FLAG}$ ) resulted in ~40% reduction in protein amount compared to  $Gys1^{+/+}Malin^{FLAG/FLAG}$ , whereas complete knockout of the gene ( $Gys1^{-/-}Malin^{FLAG/FLAG}$ ) resulted in no detectable *Gys1* protein. (D) Immunoblot analysis using brain LSS fractions from indicated genotypes of male mice. As expected, the amount of *Gbe1* protein is reduced in  $Gbe1^{ys/ys}Malin^{FLAG/FLAG}$  brains but not in  $Laforin^{-/-}Malin^{FLAG/FLAG}$ ,  $Laforin^{+/+}Malin^{FLAG/FLAG}$  or  $Gbe1^{+/+}Malin^{FLAG/FLAG}$  ones (upper blot). Middle blot shows that laforin is not detected in  $Laforin^{-/-}Malin^{FLAG/FLAG}$  mice, but is in all other indicated genotypes. (E) Representative images from PAS-D stained brains from 7 month-old  $Gbe1^{ys/ys}Malin^{FLAG/FLAG}$  and 12 month-old  $Laforin^{-/-}Malin^{FLAG/FLAG}$ ,  $Laforin^{+/+}Malin^{FLAG/FLAG}$  are shown. The images represent n=2 per group where male mice were used. Arrows indicate polyglucosan bodies. TP, total protein.

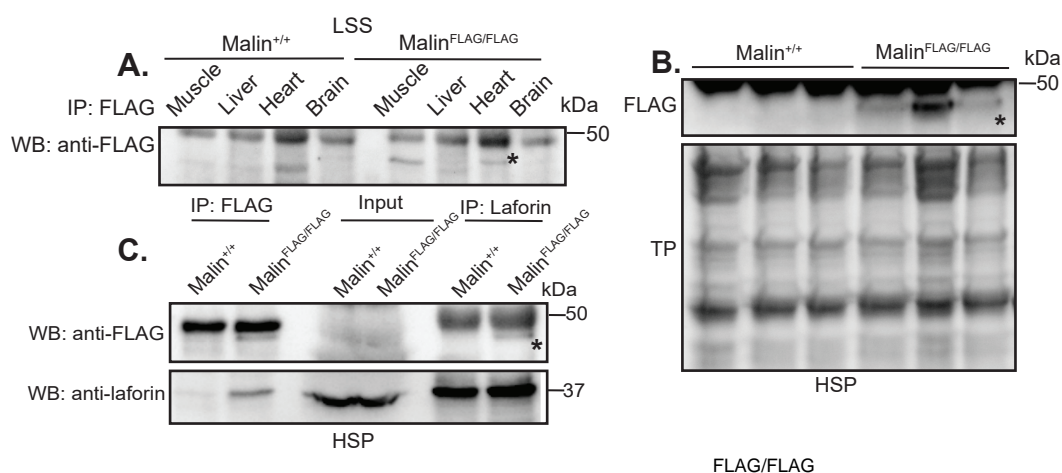

**Fig. S4. (A) Immunoprecipitation of FLAG-malin in multiple tissues of female mice.** Lysates from the indicated tissues of female *Malin<sup>FLAG/FLAG</sup>* and *Malin<sup>+/+</sup>* mice were immunoprecipitated using anti-FLAG antibody and immunoblot analysis was carried out using anti-FLAG antibody. Representative image from two independent experiments is shown. (B) Immunoblot analysis using anti-FLAG with HSP fraction from muscle tissues from the indicated genotypes of female mice (n=3) shows FLAG-malin band in *Malin<sup>FLAG/FLAG</sup>* mice but not in *Malin<sup>+/+</sup>* mice (upper blot). Lower blot shows total protein (TP). (C) Co-immunoprecipitation of FLAG-malin and laforin at the HSP fraction. HSP fractions from muscle tissues of female *Malin<sup>FLAG/FLAG</sup>* and *Malin<sup>+/+</sup>* mice were immunoprecipitated using anti-FLAG or anti-laforin antibodies and the HSP fraction (input) or the immunoprecipitates were immunoblotted with anti-FLAG (upper blot) and anti-laforin antibodies (lower blot). In all blots, FLAG-malin band is indicated by an asterisk.

**Table S1. Genotyping primers used in this study to validate mouse models**

| Primer name                    | Purpose                                             | Sequence (5'-3')                             | Amplicon size (bp)                                                        |
|--------------------------------|-----------------------------------------------------|----------------------------------------------|---------------------------------------------------------------------------|
| FL-malin-F<br>FL-malin-R       | Detect <i>Nhlrc1</i> with or without FLAG insertion | ACTGCGTCGTGCGTCCGCC<br>GCTGCCACCGCCGTCGCCTC  | 153 ( <i>Nhlrc1</i> <sup>+</sup> ), 177 ( <i>Nhlrc1</i> <sup>fl</sup> )   |
| CAG-Cre-F<br>CAG-Cre-R         | Detection of CAG- <i>Cre</i> transgene              | AGGTTCGTTCACTCATGGA<br>TCGACCAGTTTAGTTACCC   | 235 ( <i>Cre</i> <sup>+</sup> )                                           |
| Exon remove-F<br>Exon remove-R | Detection of exon 6-8 excision of <i>Gys1</i>       | AGGGTCAAGTAGCGGTGTTG<br>AACGCCCTACCATGAGCTAC | 2.1 Kbp ( <i>Gys1</i> <sup>+</sup> ) and 293 ( <i>Gys1</i> <sup>-</sup> ) |

**Table S2. Primers used in qPCR study for gene expression**

| Gene           | Primers                | Sequence (5'-3')                               |
|----------------|------------------------|------------------------------------------------|
| <i>Epm2a</i>   | Epm2a_F<br>Epm2a_R     | CTGGGAAGGAAATGGACCTCA<br>GGCCTCAATCCAGTGTCTTA  |
| <i>Nhlrc1</i>  | Nhlrc1_F<br>Nhlrc1_R   | CTGCTAGCGTCATGGGCATA<br>CACAAAGTGCTTCAGGCGTC   |
| <i>Gbe1</i>    | Gbe1_F<br>Gbe1_R       | GATTCTGACGCAGCGGAGTA<br>GAAGGATGAGAGCCACTCGG   |
| <i>Pygm</i>    | Pygm_F<br>Pygm_R       | CTCCAGGACATCATCCGACG<br>GCTGGATGGCCACCTTATCA   |
| <i>Pygb</i>    | Pygb_F<br>Pygb_R       | CATGATCCAGTTGTGGGCGA<br>AGCCGCTGGGATCACTTTC    |
| <i>Rbck1</i>   | Rbck1_F<br>Rbck1_R     | GCAGGGAGTACCAAGACGAC<br>CAGCAGATCTCAGTGTGGCA   |
| <i>Gys1</i>    | Gys1_F<br>Gys1_R       | GTCCTCGCTTCCAGGATTGG<br>TG TAGATGCCACCCACCTTGT |
| <i>Ppp1r3c</i> | Ppp1r3c_F<br>Ppp1r3c_R | ATGGAAACCTGACGGAGTGC<br>CAAGTTCTCCACTCTCCCC    |
| <i>Agl</i>     | Agl_F<br>Agl_R         | CGACCGAAACATGAAGGACG<br>CAGCAGACCCATCTCTTGGAG  |
| <i>Sharpin</i> | Sharpin_F<br>Sharpin_R | CCTGGGGCGGTCAGTTT<br>GGAAGTGCACGCTGAAGGTT      |
| <i>HOIP</i>    | HOIP_F<br>HOIP_R       | AGAGAGCCTAGACCCCGATG<br>AAGCCAAAGGAACACTGGGC   |
| <i>Actin</i>   | Actin_F<br>Actin_R     | AGTGTGACGTTGACATCCGTA<br>GCCAGAGCAGTAATCTCCTTC |
| <i>Rpl4</i>    | Rpl4_F<br>Rpl4_R       | CCTTACGCCAAGACTATGC<br>TGGAACAACCTTCTCGGATT    |
| <i>Oaz1</i>    | Oaz1_F<br>Oaz1_R       | AGGGCAGTAAGGACAGTTTTG<br>TCTCACAATCTCAAAGCCAAG |
